# Supplementary material
Source: PubMed Central journal article supplement (PMC9053227)
Supplement: 43856_2021_60_MOESM2_ESM.pdf [file 43856_2021_60_MOESM2_ESM.pdf]

## Description of Additional Supplementary Files

**File Name:** Supplementary Data 1

**Description:** HERV-K and HERV-W *env* ddPCR measurements of FTD (n=63), ALS (n=89) and control (n=21) serum (Tab 1). HERV-K and HERV-W *env* qPCR measurements of the superior frontal cortex (SFC) and cerebellum of FTD (n = 10) and control (n = 11) brain (Tab 2). Expression of TDP-43, HERV-K and HERV-W in SH-SY5Y neuronal cells transfected with the human wild type *TARDBP* cDNA (TDP-43) (n = 5) or empty vector plasmid control (mock) (n = 6) (Tab 3).
